# Supplementary material
Source: Springer Nature journal article supplement (https://www.springermedizin.de/resource/supplementary/12916_2011_484_MOESM2_ESM.pdf/9598146)
Supplement: MOESM2 [file 9598146]

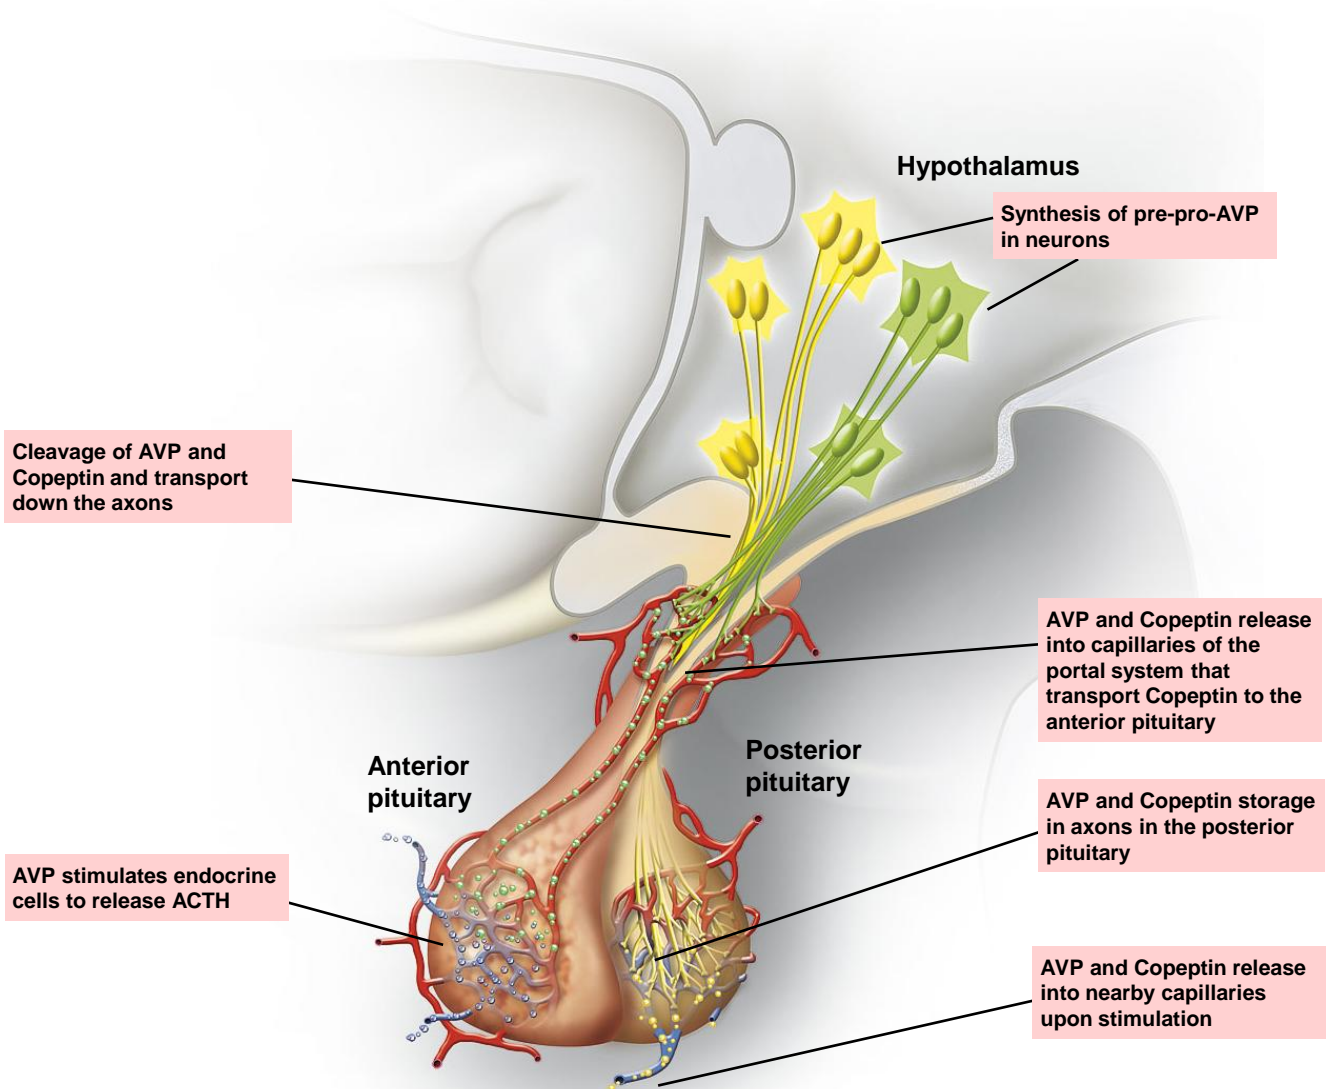

**Hypothalamus**

Synthesis of pre-pro-AVP in neurons

Cleavage of AVP and Copeptin and transport down the axons

AVP and Copeptin release into capillaries of the portal system that transport Copeptin to the anterior pituitary

**Anterior pituitary**

**Posterior pituitary**

AVP and Copeptin storage in axons in the posterior pituitary

AVP stimulates endocrine cells to release ACTH

AVP and Copeptin release into nearby capillaries upon stimulation
